# Supplementary material
Source: PubMed Central journal article supplement (PMC8115023)
Supplement: NIHMS1688453-supplement-Supplemental_Material.pdf [file NIHMS1688453-supplement-Supplemental_Material.pdf]

## Supplementary Materials for

### **Preexisting immunity shapes distinct antibody landscapes after influenza virus infection and vaccination in humans**

Haley L. Dugan, Jenna J. Guthmiller, Philip Arevalo, Min Huang, Yao-Qing Chen, Karlynn E. Neu, Carole Henry, Nai-Ying Zheng, Linda Yu-Ling Lan, Micah E. Tepora, Olivia Stovicek, Dalia Bitar, Anna-Karin E. Palm, Christopher T. Stamper, Siriruk Changrob, Henry A. Utset, Lynda Coughlan, Florian Krammer, Sarah Cobey, Patrick C. Wilson\*

\*Corresponding author. Email: [wilsonp@uchicago.edu](mailto:wilsonp@uchicago.edu)

Published 9 December 2020, *Sci. Transl. Med.* **12**, eabd3601 (2020)  
DOI: 10.1126/scitranslmed.abd3601

#### **The PDF file includes:**

- Fig. S1. Reactivity of influenza virus infection–induced antibodies from individual participants and conserved epitope reactivity.
- Fig. S2. Neutralization potency of influenza virus infection– and vaccination-induced antibodies stratified by subtype reactivity.
- Fig. S3. Antibody cross-reactivity and affinity toward past strains by individual participants.
- Fig. S4. Prophylactic protection of influenza virus infection– and vaccination-induced antibodies at 0.2 and 5 mg/kg.
- Table S1. Participant characteristics for influenza virus infection cohorts.
- Table S2. Participant characteristics for influenza virus vaccination cohorts.
- Table S3. Reference childhood strains used to characterize infection-induced mAbs.
- Table S4. mAbs used for the infection- and vaccination-induced antibody cocktails.
- Table S5. mAbs used in the antigen comparison cocktails.

#### **Other Supplementary Material for this manuscript includes the following:**

(available at [stm.sciencemag.org/cgi/content/full/12/573/eabd3601/DC1](http://stm.sciencemag.org/cgi/content/full/12/573/eabd3601/DC1))

Data file S1 (Microsoft Excel format). Raw data.

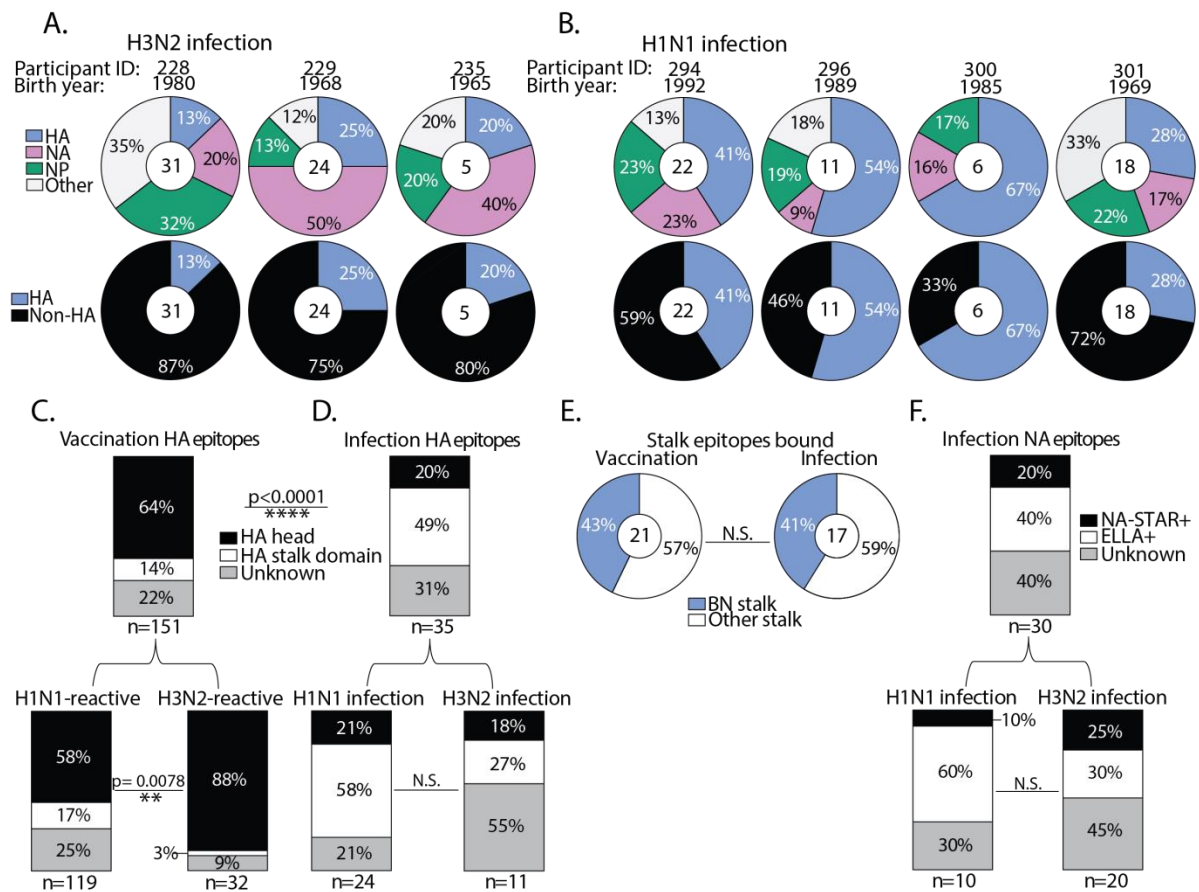

**Fig. S1. Reactivity of influenza virus infection-induced antibodies from individual participants and conserved epitope reactivity.** (A, B) Pie charts show binding of 2014–2015 H3N2 infection-induced mAbs (A) and 2015–2016 H1N1 infection-induced mAbs (B) to a panel of hemagglutinin (HA), neuraminidase (NA), and nucleoprotein (NP) recombinant proteins by ELISA. Recombinant proteins were chosen from the relevant circulating strains during the time of mAb isolation from infected individuals. (C, D) Bar charts demonstrate influenza virus HA epitopes bound by vaccination-induced HA-reactive mAbs (C) and infection-induced HA-reactive mAbs (D). (E) Pie charts demonstrate the percentage of distinct stalk epitopes bound by stalk domain-reactive mAbs. MABs binding the broadly neutralizing stalk epitope were determined by CR9114 competition ELISA, and mAbs binding undefined stalk epitopes were determined by ELISA against a headless HA stalk construct and chimeric HA. (F) Bar charts display NA epitopes bound by NA-reactive infection-induced mAbs, determined by NA-STAR and ELLA assay. Numbers in the center of or below each chart indicate the number of mAbs tested. Statistical significance was determined by Fisher’s exact test, \*\*\*\* $p < 0.0001$ ; \*\* $p = 0.0078$  (C–F). Data are representative of 2–3 independent experiments performed in duplicate.

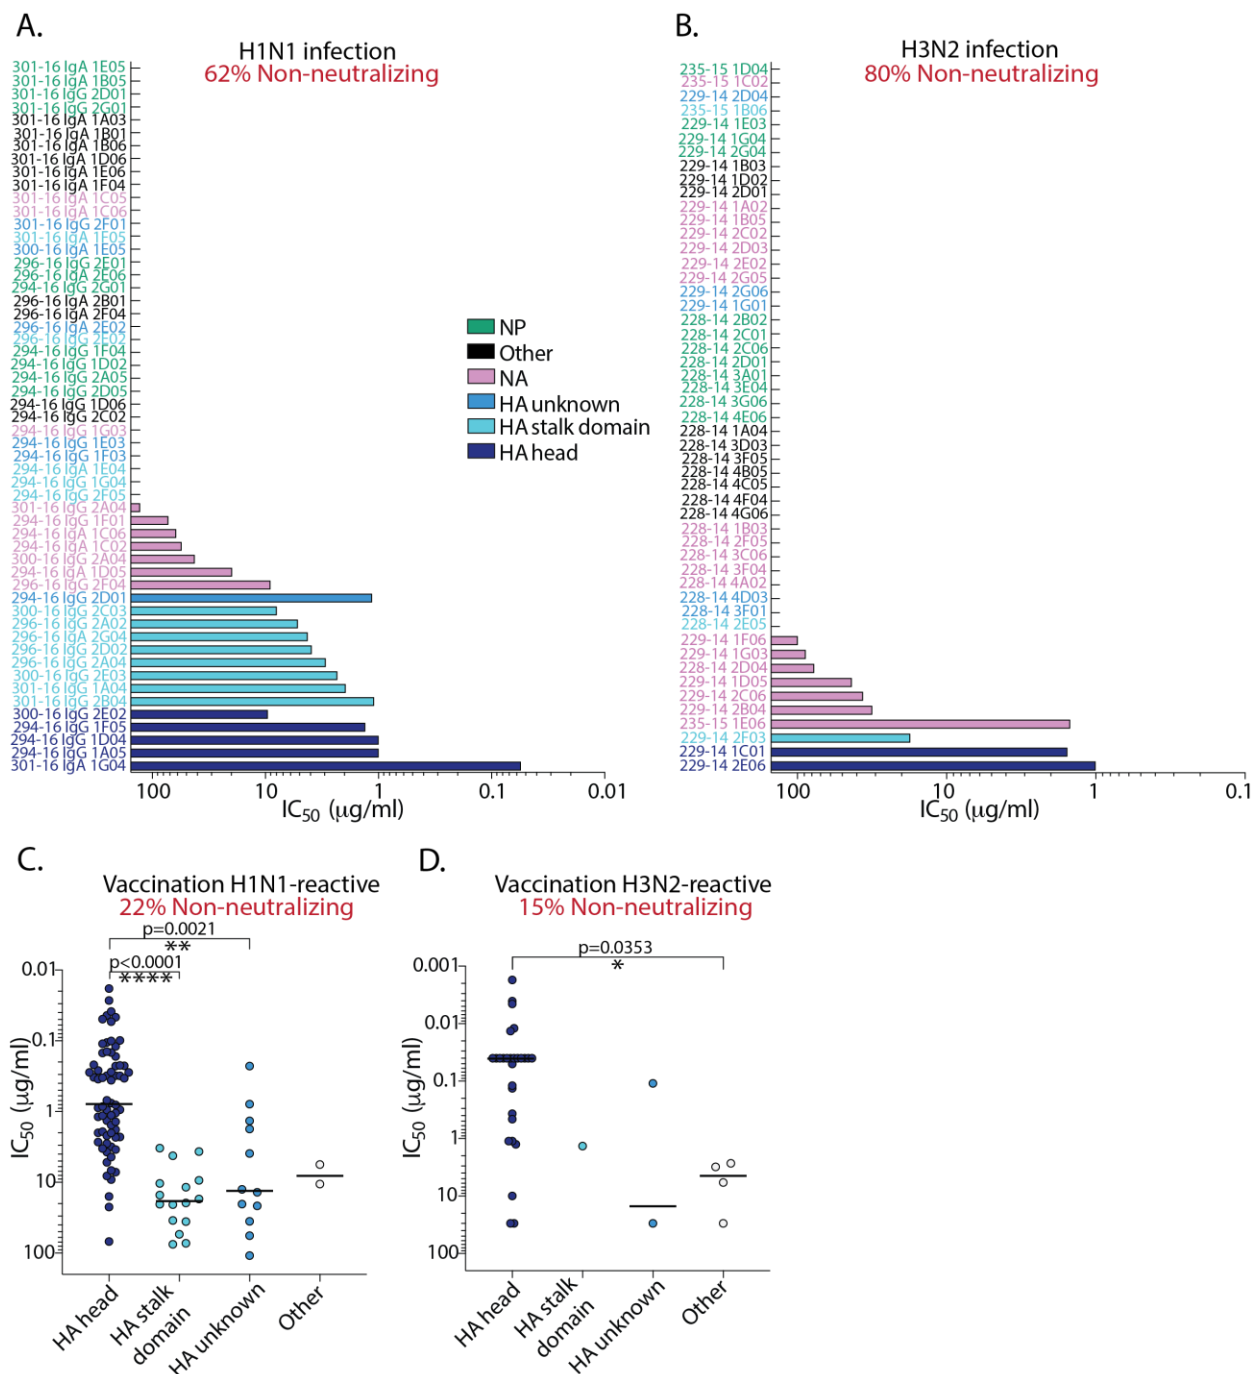

**Fig. S2. Neutralization potency of influenza virus infection- and vaccination-induced antibodies stratified by subtype reactivity.** (A, B) Bar graphs display the potency of HA-reactive and NA-reactive neutralizing mAbs induced by H1N1 infection (n= 56) (A) and H3N2 infection (n= 51) (B), expressed as microneutralization (MN) IC<sub>50</sub> values. (C, D) The potency of vaccination-induced mAbs binding distinct epitopes was compared for H1N1-reactive (n=100) (C) and H3N2-reactive (n=39) mAbs (D), depicted as MN IC<sub>50</sub> values. Statistical significance was determined using an unpaired non-parametric Kruskal-Wallis test with Dunn's correction for

multiple comparisons, \*\*\*\* $p < 0.0001$ ; \*\* $p = 0.0021$ ; \* $p = 0.0353$  (C–D). Data are representative of 2–3 independent experiments performed in duplicate.

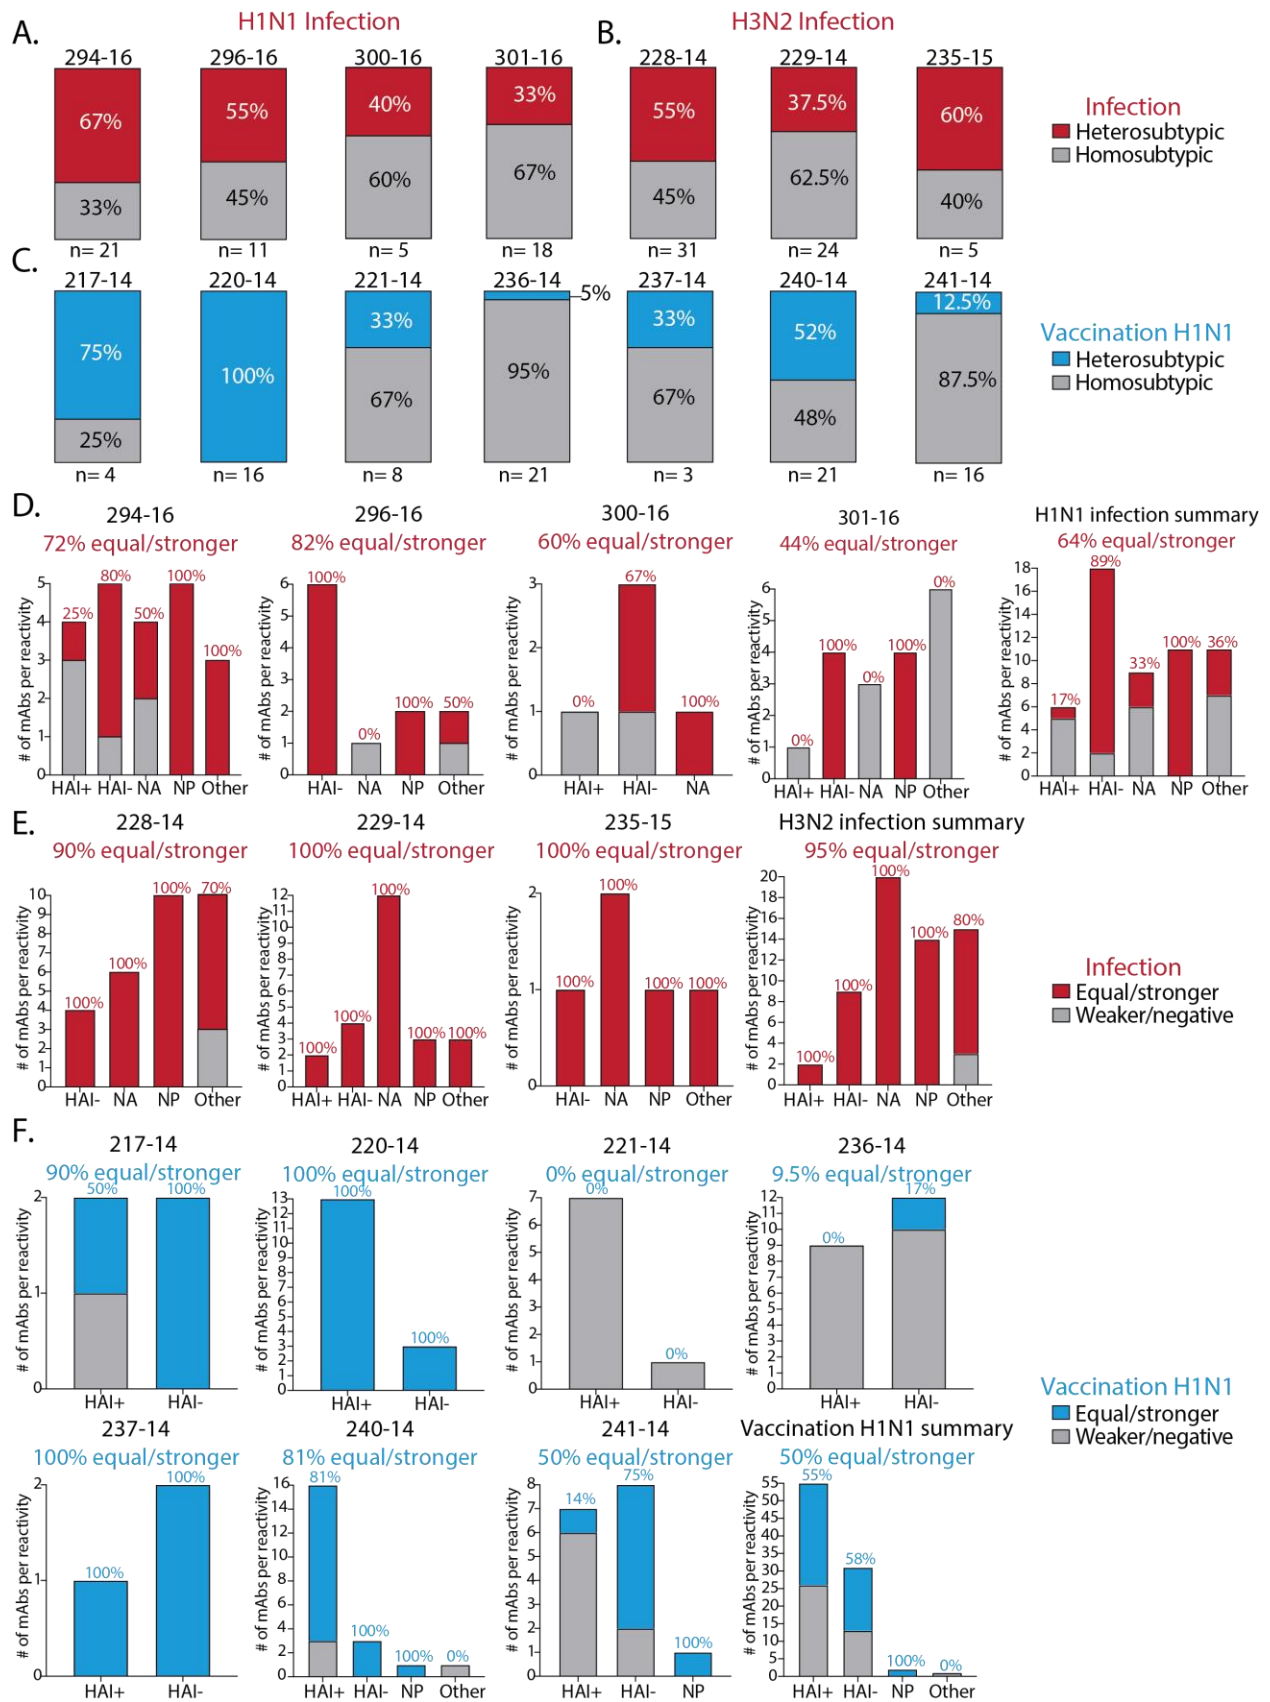

**Fig. S3. Antibody cross-reactivity and affinity toward past strains by individual participants. (A–C)** Bar charts display heterosubtypic cross-reactivity for H1N1 infection-

induced mAbs tested against H3N2 strains (**A**), H3N2 infection-induced mAbs tested against H1N1 strains (**B**), and H1N1-reactive quadrivalent influenza vaccine-induced mAbs tested against H3N2 strains (**C**). Heterosubtypic cross-reactivity was defined based on the ability of a mAb to bind to at least one or more strains opposite of the inducing subtype. (**D–F**) Bar graphs display mAbs from H1N1-infected individuals (**D**), H3N2-infected individuals (**E**), and vaccinated individuals (**F**; quadrivalent influenza vaccine, H1N1-reactive) exhibiting equal or stronger affinity to past viral strains relative to inducing strains. Data are broken down by individual mAb reactivities and summarized for each cohort in the last graph of each panel. Numbers below each bar chart indicate the number of mAbs tested per individual, and data are representative of 2–3 independent experiments performed in duplicate.

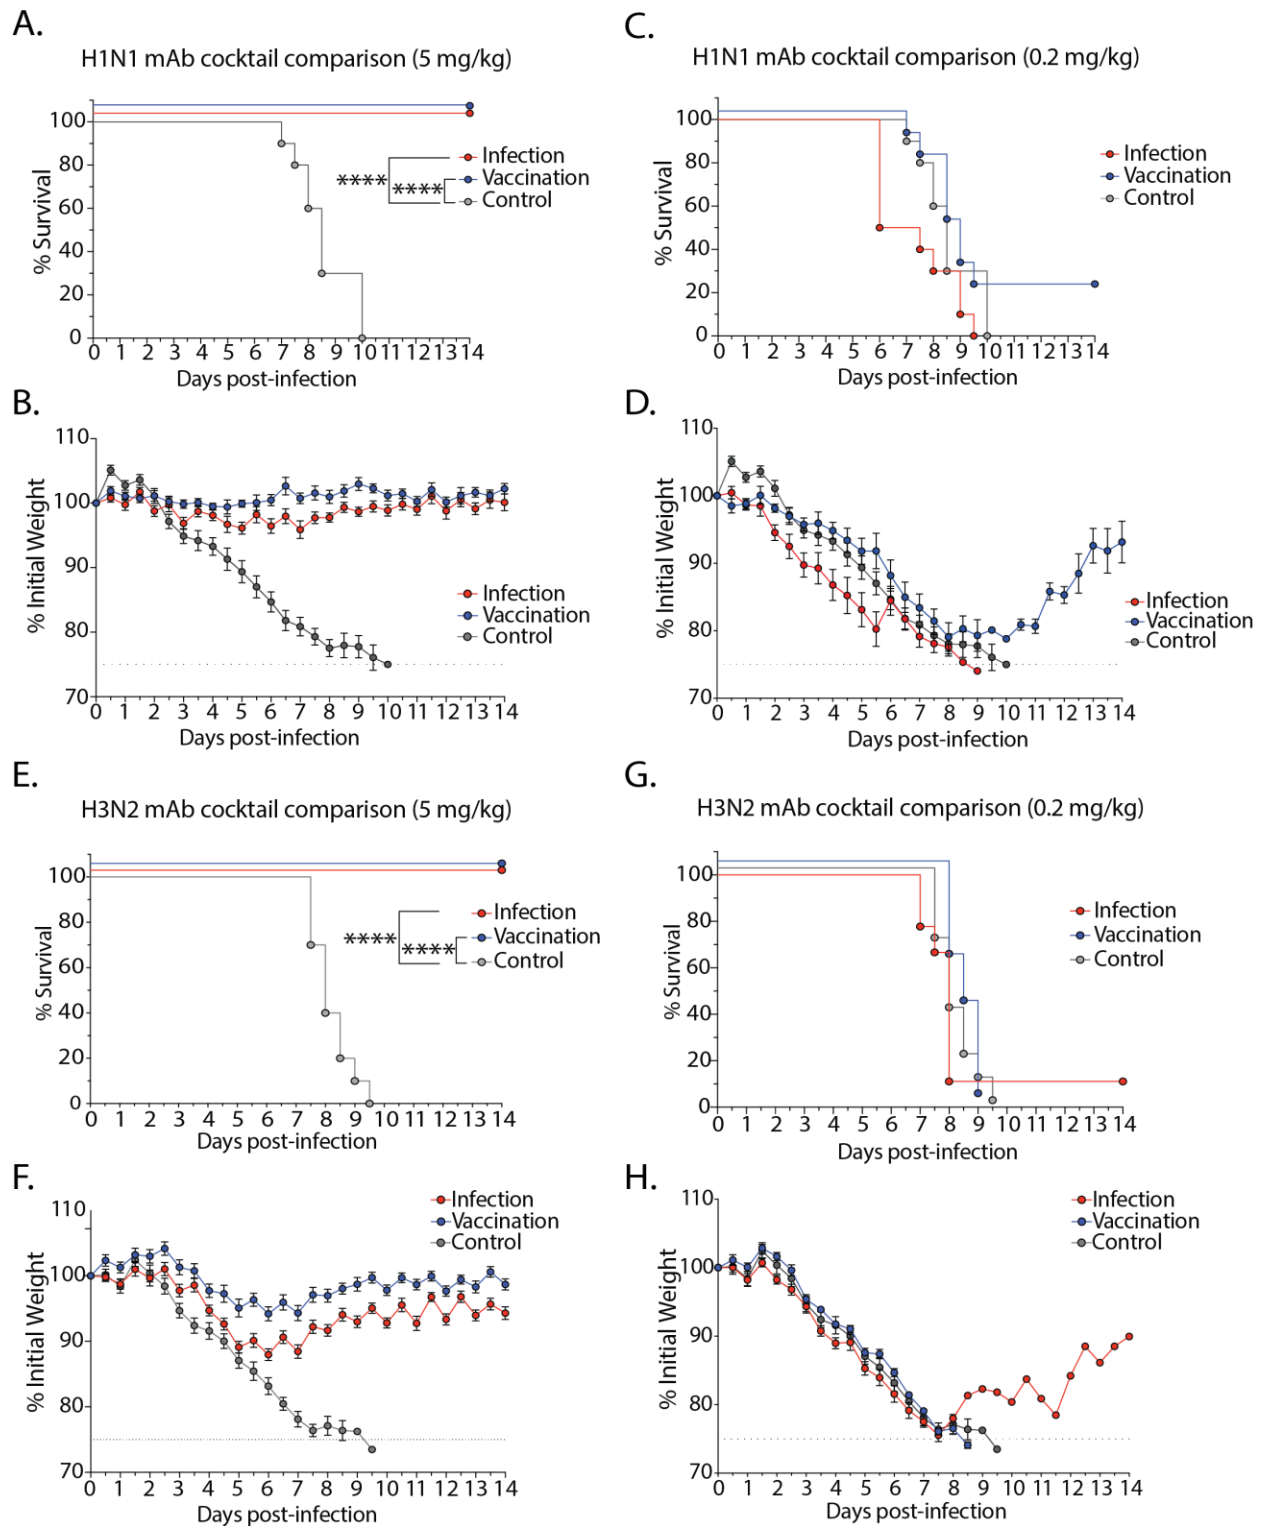

**Fig. S4. Prophylactic protection of influenza virus infection- and vaccination-induced antibodies at 0.2 and 5 mg/kg.** (A–D) Weight loss and survival curves display in vivo prophylactic protective ability of infection- and vaccination-induced mAb cocktails administered intraperitoneally at 5 mg/kg (A–B) or 0.2 mg/kg (C–D) to 6–8-week-old female BALB/C mice challenged with 10 LD<sub>50</sub> mouse-adapted A/Netherlands/602/2009 H1N1 virus. (E–H) Weight

loss and survival curves display in vivo prophylactic protective ability of infection and vaccination-induced mAb cocktails administered intraperitoneally at 5 mg/kg (**E–F**) or 0.2 mg/kg (**G–H**) to 6–8-week-old female BALB/C mice challenged with 10 LD<sub>50</sub> mouse-adapted A/Philippines/2/1982 H3N2 virus. Data are representative of two independent experiments and depicted as survival (**A, C, E, G**) and weight loss (**B, D, F, H**) curves. Statistical significance for survival curves was determined using a Mantel-Cox log-rank test, \*\*\*\*p<0.0001. Weight loss is presented as mean±SEM (n=9–10 mice per group).



| Participant ID | Season    | Age | Sex | Influenza A Strain                   | Comorbidities | Vaccination History                 | Sampling time |
|----------------|-----------|-----|-----|--------------------------------------|---------------|-------------------------------------|---------------|
| 228-14         | 2014–2015 | 34  | M   | S H3N2<br>A/Switzerland/9715293/2013 | Asthma        | 2011–2012<br>2012–2013<br>2013–2014 | D7            |
| 229-14         | 2014–2015 | 46  | F   | S H3N2<br>A/Switzerland/9715293/2013 | COPD Asthma   | 2011–2012<br>2012–2013              | D7            |
| 235-15         | 2014–2015 | 49  | M   | S H3N2<br>A/Switzerland/9715293/2013 | Asthma        | 2009–2014                           | D7            |
| 294-16         | 2015–2016 | 23  | M   | Pan H1N1<br>A/California/7/2009      | None          | 2015–2016                           | D7            |
| 296-16         | 2015–2016 | 26  | M   | Pan H1N1<br>A/California/7/2009      | None          | No History                          | D7            |
| 300-16         | 2015–2016 | 30  | M   | Pan H1N1<br>A/California/7/2009      | None          | No History                          | D11           |
| 301-16         | 2015–2016 | 46  | F   | Pan H1N1<br>A/California/7/2009      | Asthma        | 2014–2015                           | D8            |

**Table S1. Participant characteristics for influenza virus infection cohorts.** Likely infecting strains for the specified influenza seasons are referenced (63, 64). Vaccination history represents any known history within three years prior to the current sampling time. Sampling time is estimated based on the total number of days participants had been experiencing symptoms of influenza illness at the time of the study visit. All participants were PCR-confirmed influenza positive. S: seasonal; Pan: pandemic; COPD: chronic obstructive pulmonary disease.

| Participant ID | Season    | Age | Sex | Vaccine | Influenza A Vaccine Strains                          | Vaccination History | Sampling time |
|----------------|-----------|-----|-----|---------|------------------------------------------------------|---------------------|---------------|
| 008-10         | 2010–2011 | 26  | F   | TIV     | A/California/7/2009 (H1N1)<br>A/Perth/16/2009 (H3N2) | 2009–2010           | D7            |
| 009-10         | 2010–2011 | 25  | F   | TIV     | A/California/7/2009 (H1N1)<br>A/Perth/16/2009 (H3N2) | 2009–2010           | D7            |
| 011-10         | 2010–2011 | 30  | --- | TIV     | A/California/7/2009 (H1N1)<br>A/Perth/16/2009 (H3N2) | 2009–2010           | D7            |
| 014-10         | 2010–2011 | 27  | M   | TIV     | A/California/7/2009 (H1N1)<br>A/Perth/16/2009 (H3N2) | 2009–2010           | D7            |
| 017-10         | 2010–2011 | 24  | M   | TIV     | A/California/7/2009 (H1N1)<br>A/Perth/16/2009 (H3N2) | 2009–2010           | D7            |
| 019-10         | 2010–2011 | 23  | F   | TIV     | A/California/7/2009 (H1N1)<br>A/Perth/16/2009 (H3N2) | 2009–2010           | D7            |
| 028-10         | 2010–2011 | 32  | --- | TIV     | A/California/7/2009 (H1N1)<br>A/Perth/16/2009 (H3N2) | 2009–2010           | D7            |
| 034-10         | 2010–2011 | 40  | F   | TIV     | A/California/7/2009 (H1N1)<br>A/Perth/16/2009 (H3N2) | 2009–2010           | D7            |
| 039-10         | 2010–2011 | 25  | M   | TIV     | A/California/7/2009 (H1N1)<br>A/Perth/16/2009 (H3N2) | 2009–2010           | D7            |
| 051-10         | 2010–2011 | 43  | M   | TIV     | A/California/7/2009 (H1N1)<br>A/Perth/16/2009 (H3N2) | 2009–2010           | D7            |
| 217-14         | 2014–2015 | 31  | M   | QIV     | A/California/7/2009 (H1N1)<br>A/Texas/50/2012 (H3N2) | 2013–2014           | D7            |
| 220-14         | 2014–2015 | 24  | F   | QIV     | A/California/7/2009 (H1N1)<br>A/Texas/50/2012 (H3N2) | Unknown             | D7            |
| 221-14         | 2014–2015 | 34  | F   | QIV     | A/California/7/2009 (H1N1)<br>A/Texas/50/2012 (H3N2) | No History          | D7            |
| 236-15         | 2014–2015 | 32  | F   | QIV     | A/California/7/2009 (H1N1)<br>A/Texas/50/2012 (H3N2) | No History          | D7            |
| 237-14         | 2014–2015 | 32  | F   | QIV     | A/California/7/2009 (H1N1)<br>A/Texas/50/2012 (H3N2) | No History          | D7            |
| 240-15         | 2014–2015 | 28  | M   | QIV     | A/California/7/2009 (H1N1)<br>A/Texas/50/2012 (H3N2) | No History          | D7            |
| 241-15         | 2014–2015 | 29  | F   | QIV     | A/California/7/2009 (H1N1)<br>A/Texas/50/2012 (H3N2) | No History          | D7            |

|        |           |    |   |     |                                                      |           |    |
|--------|-----------|----|---|-----|------------------------------------------------------|-----------|----|
| 244-15 | 2014–2015 | 29 | M | QIV | A/California/7/2009 (H1N1)<br>A/Texas/50/2012 (H3N2) | 2013–2014 | D7 |
|--------|-----------|----|---|-----|------------------------------------------------------|-----------|----|

**Table S2. Participant characteristics for influenza virus vaccination cohorts.** Sampling time refers to day post vaccination with either the trivalent influenza vaccine (TIV) or quadrivalent influenza vaccine (QIV).

| Participant ID | Cohort                      | Year of Birth | Reference Childhood Strains                                                         |
|----------------|-----------------------------|---------------|-------------------------------------------------------------------------------------|
| 228-14         | 2014–2015<br>H3N2 Infection | 1980          | A/Philippines/2/1982 H3N2                                                           |
| 229-14         | 2014–2015<br>H3N2 Infection | 1968          | A/Hong Kong/1/1968 H3N2;<br>A/Philippines/2/1982 H3N2                               |
| 235-15         | 2014–2015<br>H3N2 Infection | 1965          | A/Hong Kong/1/1968 H3N2;<br>A/Philippines/1982 H3N2                                 |
| 294-16         | 2015–2016<br>H1N1 Infection | 1992          | A/Texas/36/1991 H1N1; A/New<br>Caledonia/20/1999, A/Solomon<br>Islands/2006         |
| 296-16         | 2015–2016<br>H1N1 Infection | 1989          | A/Texas/36/1991 H1N1; A/New<br>Caledonia/20/1999                                    |
| 300-16         | 2015–2016<br>H1N1 Infection | 1985          | A/Texas/36/1991 H1N1; A/New<br>Caledonia/20/1999                                    |
| 301-16         | 2015 H1N1<br>Infection      | 1969          | A/Chile/1/1983                                                                      |
| 217-14         | 2014–2015<br>QIV            | 1983          | A/Texas/36/1991 H1N1; A<br>Philippines/2/1982 H3N2                                  |
| 220-14         | 2014–2015<br>QIV            | 1990          | A/Texas/36/1991 H1N1; A/New<br>Caledonia/20/1999; A<br>Philippines/2/1982 H3N2      |
| 221-14         | 2014–2015<br>QIV            | 1980          | A/Texas/36/1991 H1N1; A<br>Philippines/2/1982 H3N2                                  |
| 236-15         | 2014–2015<br>QIV            | 1982          | A/Texas/36/1991 H1N1; A<br>Philippines/2/1982 H3N2                                  |
| 237-14         | 2014–2015<br>QIV            | 1982          | A/Texas/36/1991 H1N1; A<br>Philippines/2/1982 H3N2                                  |
| 240-15         | 2014–2015<br>QIV            | 1986          | A/Texas/36/1991 H1N1; A/New<br>Caledonia/20/1999 H1N1; A<br>Philippines/2/1982 H3N2 |
| 241-15         | 2014–2015<br>QIV            | 1985          | A/Texas/36/1991 H1N1; A/New<br>Caledonia/20/1999 H1N1, A<br>Philippines/2/1982 H3N2 |

**Table S3. Reference childhood strains used to characterize infection-induced mAbs.**

Reference childhood strains were chosen based on available virus strains circulating within the first 10–15 years of the individual’s life. A mAb was chosen as having equal or greater reactivity toward the reference viral strain if the affinity toward one or more of the indicated reference strains was within the same log molar range or greater than the affinity toward the contemporary inducing strain. QIV: Quadrivalent influenza vaccine.

| <b>Infection-induced mAb cocktails</b>   |                           |                       |                              |
|------------------------------------------|---------------------------|-----------------------|------------------------------|
| <b>H1N1 Infection</b>                    | <b>Antigen Reactivity</b> | <b>Heterosubtypic</b> | <b>Neutralizing (NL09)</b>   |
| 294 1A05                                 | HA head                   | No                    | Yes                          |
| 294 1E03                                 | HA unknown                | Yes                   | No                           |
| 296 2A04                                 | HA stalk/unknown          | No                    | Yes                          |
| 296 2E02                                 | HA stalk/unknown          | Yes                   | No                           |
| 296 2G04                                 | HA stalk/CR9114 epitope   | Yes                   | Yes                          |
| 301 1A04                                 | HA stalk/CR9114 epitope   | No                    | Yes                          |
| 294 1C02                                 | NA/near active site       | No                    | Yes                          |
| 294 1G03                                 | NA/unknown                | Yes                   | No                           |
| 296 2E01                                 | NP                        | Yes                   | No                           |
| 301 1E05                                 | NP                        | Yes                   | No                           |
| <b>H3N2 Infection</b>                    | <b>Antigen Reactivity</b> | <b>Heterosubtypic</b> | <b>Neutralizing (Phil82)</b> |
| 229 1G01                                 | HA unknown                | Yes                   | No                           |
| 229 2G06                                 | HA unknown                | Yes                   | No                           |
| 228 3F01                                 | HA unknown                | Yes                   | No                           |
| 229 1F06                                 | NA/active site            | No                    | No                           |
| 229 1G03                                 | NA/active site            | No                    | Yes                          |
| 229 1B05                                 | NA/near active site       | No                    | No                           |
| 229 2C06                                 | NA/near active site       | No                    | Yes                          |
| 228 2C06                                 | NP                        | Yes                   | No                           |
| 228 3A01                                 | NP                        | Yes                   | No                           |
| 235 1D04                                 | NP                        | Yes                   | No                           |
| <b>Vaccination-induced mAb cocktails</b> |                           |                       |                              |
| <b>H1N1-reactive</b>                     | <b>Antigen Reactivity</b> | <b>Heterosubtypic</b> | <b>Neutralizing (NL09)</b>   |
| 220 2F06                                 | HA head                   | No                    | Yes                          |
| 236 IgA 1A02                             | HA head                   | No                    | No                           |
| 236 IgG 1A02                             | HA stalk/unknown          | No                    | Yes                          |
| 236 1C04                                 | HA head                   | No                    | Yes                          |
| 236 1D01                                 | Other                     | No                    | No                           |
| 236 2A04                                 | HA head                   | No                    | Yes                          |
| 240 1A01                                 | HA head                   | Yes                   | Yes                          |
| 241 2F01                                 | HA head                   | No                    | Yes                          |
| 240 1C04                                 | HA stalk/CR9114 epitope   | No                    | Yes                          |
| 240 1E01                                 | HA head                   | Yes                   | Yes                          |
| <b>H3N2-reactive</b>                     | <b>Antigen Reactivity</b> | <b>Heterosubtypic</b> | <b>Neutralizing (Phil82)</b> |
| 220 1E03                                 | HA head                   | No                    | Yes                          |
| 220 1G04                                 | HA head                   | No                    | No                           |
| 240 1A06                                 | HA head                   | Yes                   | Yes                          |
| 217 1D05                                 | HA/unknown                | Yes                   | No                           |
| 008-10 5E04                              | HA head                   | Yes                   | No                           |
| 217 1H02                                 | HA/unknown                | Yes                   | Yes                          |
| 240 2F02                                 | HA stalk                  | No                    | No                           |
| 034 3E01                                 | HA head                   | Yes                   | Yes                          |
| DR2A02                                   | HA head                   | No                    | Yes                          |
| 041 1C04                                 | HA head                   | Not tested            | No                           |

**Table S4. mAbs used for the infection- and vaccination-induced antibody cocktails. NL09: A/Netherlands/602/2009 H1N1 virus; Phil82: A/Philippines/2/1982 H3N2 virus.**

| <b>HA Head</b>  | <b>Heterosubtypic</b> | <b>Neutralizing (H1)</b> | <b>Source</b> |
|-----------------|-----------------------|--------------------------|---------------|
| 294 1A05        | No                    | Yes                      | Infection     |
| 236 1C04        | No                    | Yes                      | Vaccination   |
| 014 3A02        | Yes                   | Yes                      | Vaccination   |
| 019 3E05        | Yes                   | Yes                      | Vaccination   |
| 039 5E03        | No                    | Yes                      | Vaccination   |
| <b>HA Stalk</b> |                       |                          |               |
| 296 2A04        | No                    | Yes                      | Infection     |
| 301 1A04        | No                    | Yes                      | Infection     |
| 296 2D02        | Yes                   | Yes                      | Infection     |
| 296 2G04        | Yes                   | Yes                      | Infection     |
| 294 1G04        | Yes                   | No                       | Infection     |
| <b>NA</b>       |                       |                          |               |
| 300 2A04        | Yes                   | Yes                      | Infection     |
| 301 1C05        | No                    | No                       | Infection     |
| 296 2F04        | No                    | No                       | Infection     |
| 294 1C02        | No                    | Yes                      | Infection     |
| 294 1G03        | Yes                   | No                       | Infection     |
| <b>NP</b>       |                       |                          |               |
| 296 2E01        | Yes                   | No                       | Infection     |
| 294 1F04        | Yes                   | No                       | Infection     |
| 301 1B05        | Yes                   | No                       | Infection     |
| 301 1E05        | Yes                   | No                       | Infection     |
| 294 1D02        | Yes                   | No                       | Infection     |

**Table S5. mAbs used in the antigen comparison cocktails.**
